# Supplementary material for: Phosphinoquinoline supported CoII, NiII, and FeII complexes: divergent behaviour upon reduction
Source: Royal Society of Chemistry journal article supplement (doi:10.1039/d3dt02441e), 2023-01-01
Supplement: d3dt02441e1.pdf [file d3dt02441e1.pdf]

## Phosphinoquinoline supported Co<sup>II</sup>, Ni<sup>II</sup>, and Fe<sup>II</sup> complexes: divergent behaviour upon reduction

Pauline Schiltz,<sup>a</sup> Nicolas Casaretto,<sup>a</sup> Sophie Bourcier,<sup>a</sup> Audrey. Auffrant,<sup>\*a</sup> Corinne Gosmini,<sup>\*a</sup>

Laboratoire de Chimie Moléculaire (LCM), CNRS, Ecole Polytechnique, Institut Polytechnique de Paris,  
Route de Saclay, 91120 Palaiseau, France

### Table of content

|                      |   |
|----------------------|---|
| 1. NMR spectra ..... | 2 |
| 2. X-Ray data.....   | 7 |

## 1. NMR spectra

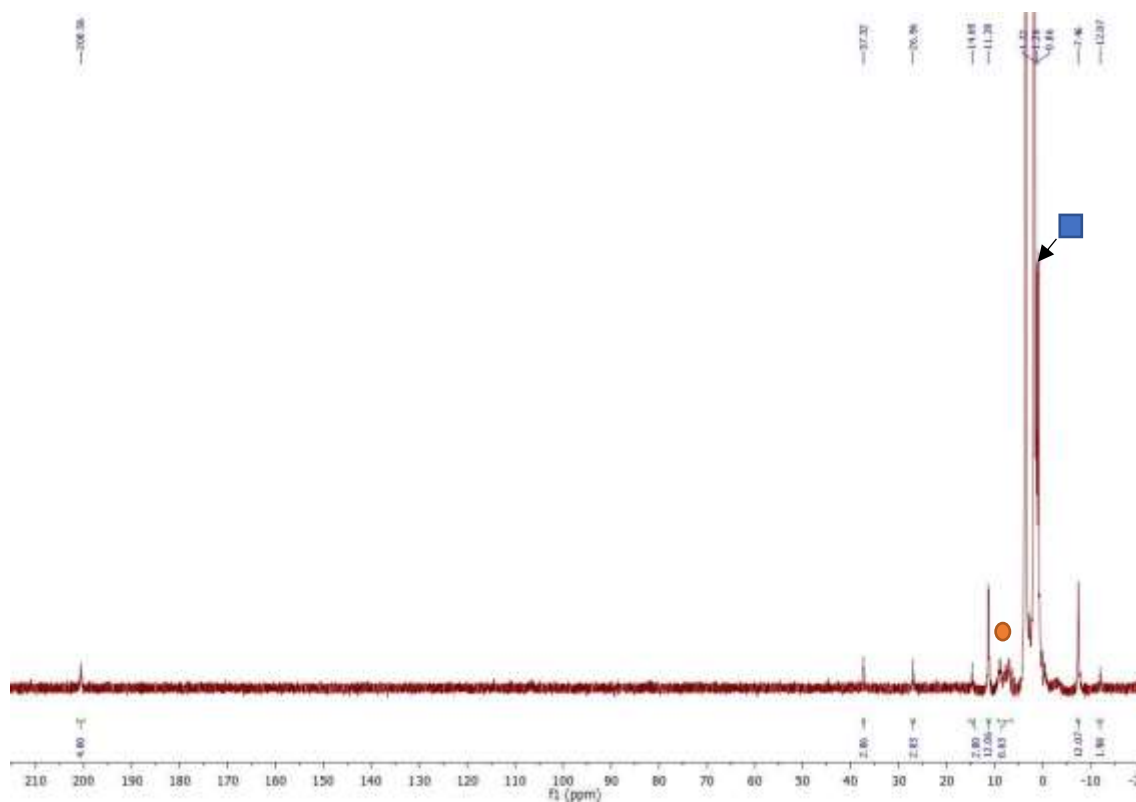

Figure S1  $^1\text{H}$  NMR spectrum of  $[\text{Co}(\text{L}^h)\text{Br}](\text{CoBr}_3)$  in  $\text{THF-d}_8$  (free ligand (16 %, ●), pentane (■ masked by a THF resonance))

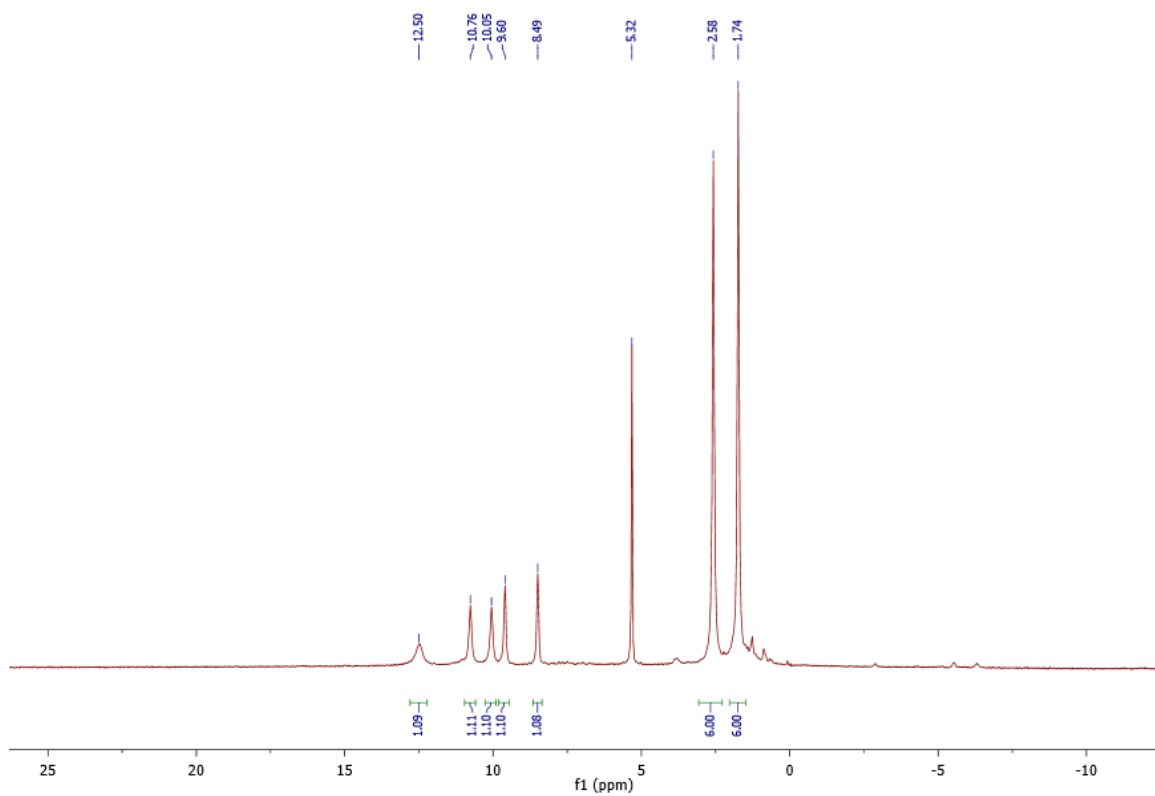

Figure S2:  $^1\text{H}$  NMR spectrum of  $[\text{NiLBr}_2]$  in  $\text{CD}_2\text{Cl}_2$

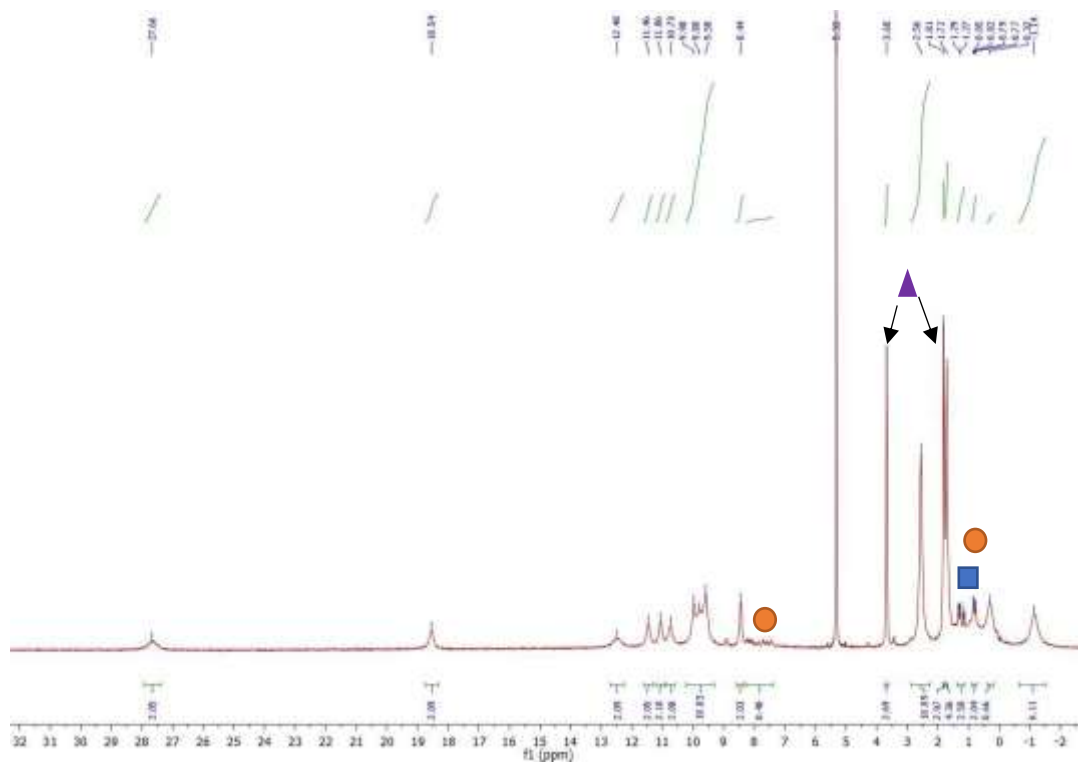

Figure S3:  $^1\text{H}$  NMR spectrum of  $[\text{NiL}_2\text{Br}](\text{Br})$  in  $\text{CD}_2\text{Cl}_2$  (free ligand (10%,  $\bullet$ ), THF ( $\blacktriangle$ , 67%), pentane ( $\blacksquare$ ).

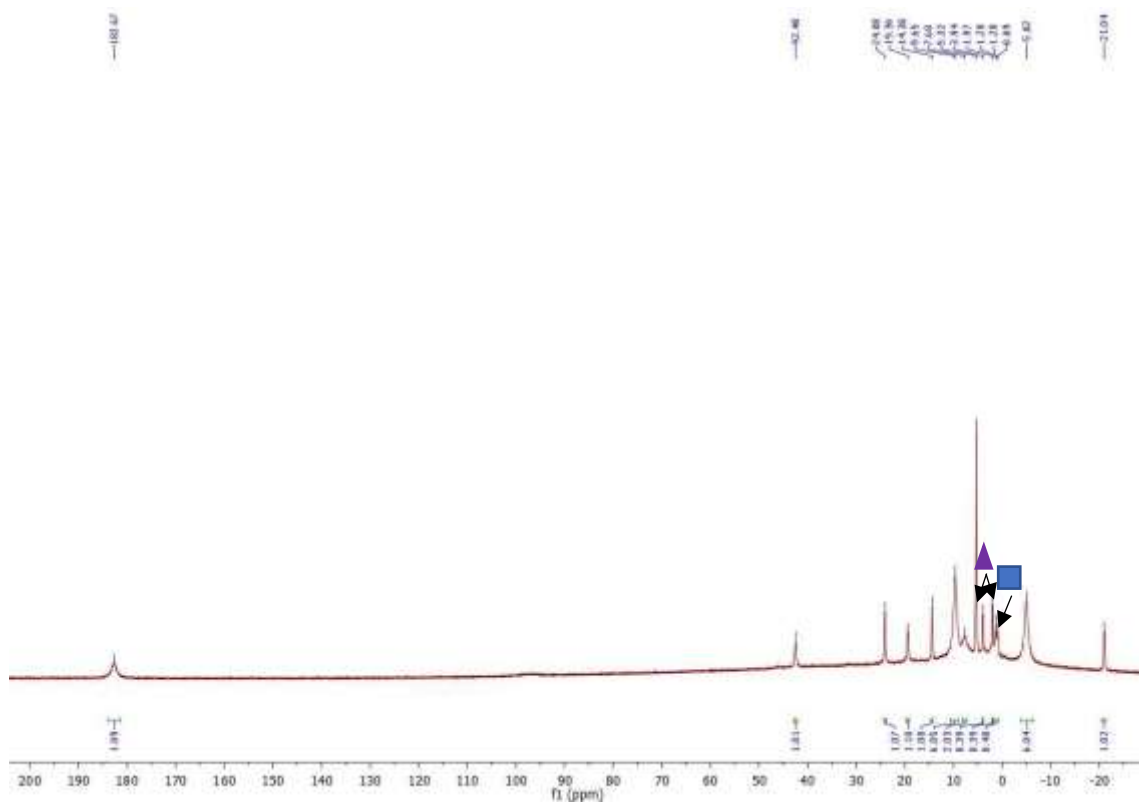

Figure S4:  $^1\text{H}$  NMR spectrum of  $[\text{FeLBr}_2]$  in  $\text{CD}_2\text{Cl}_2$  THF ( $\blacktriangle$  10%), pentane ( $\blacksquare$  4%)

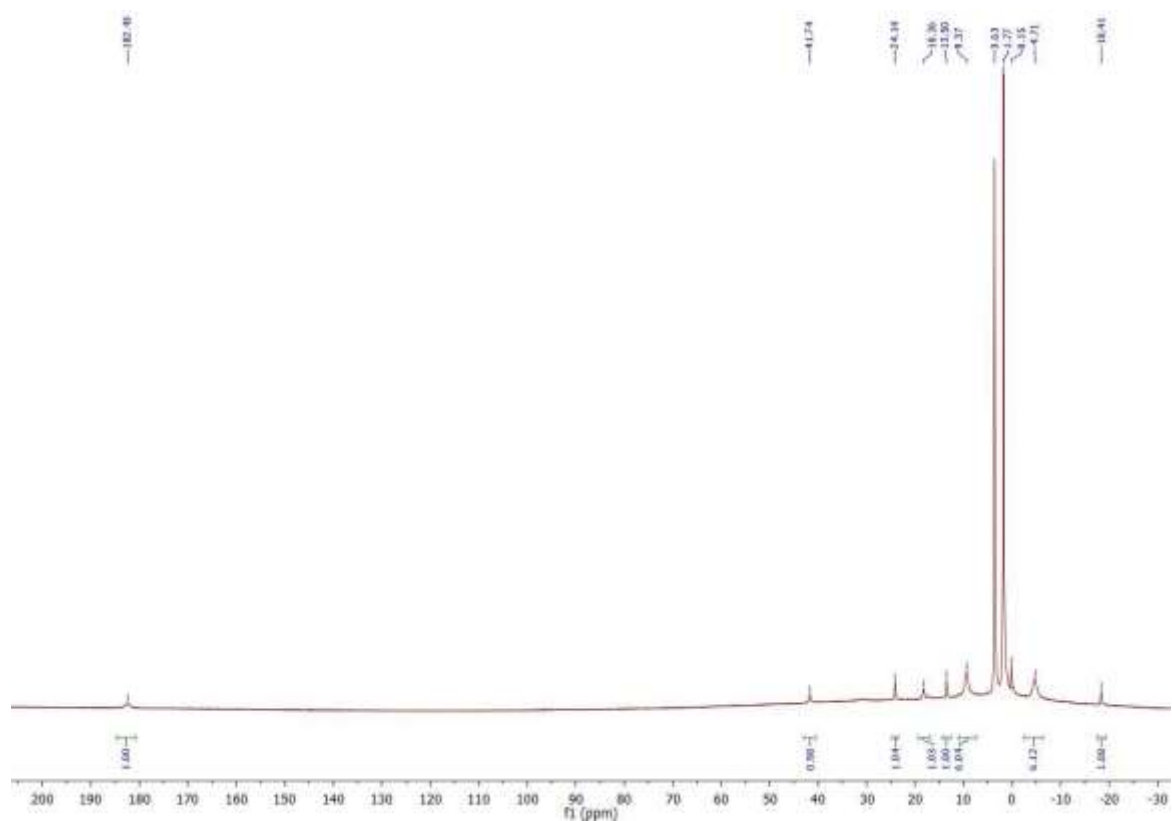

Figure S5:  $^1\text{H}$  NMR spectrum of  $[\text{FeLBr}_2]$  in  $\text{THF-d}_8$

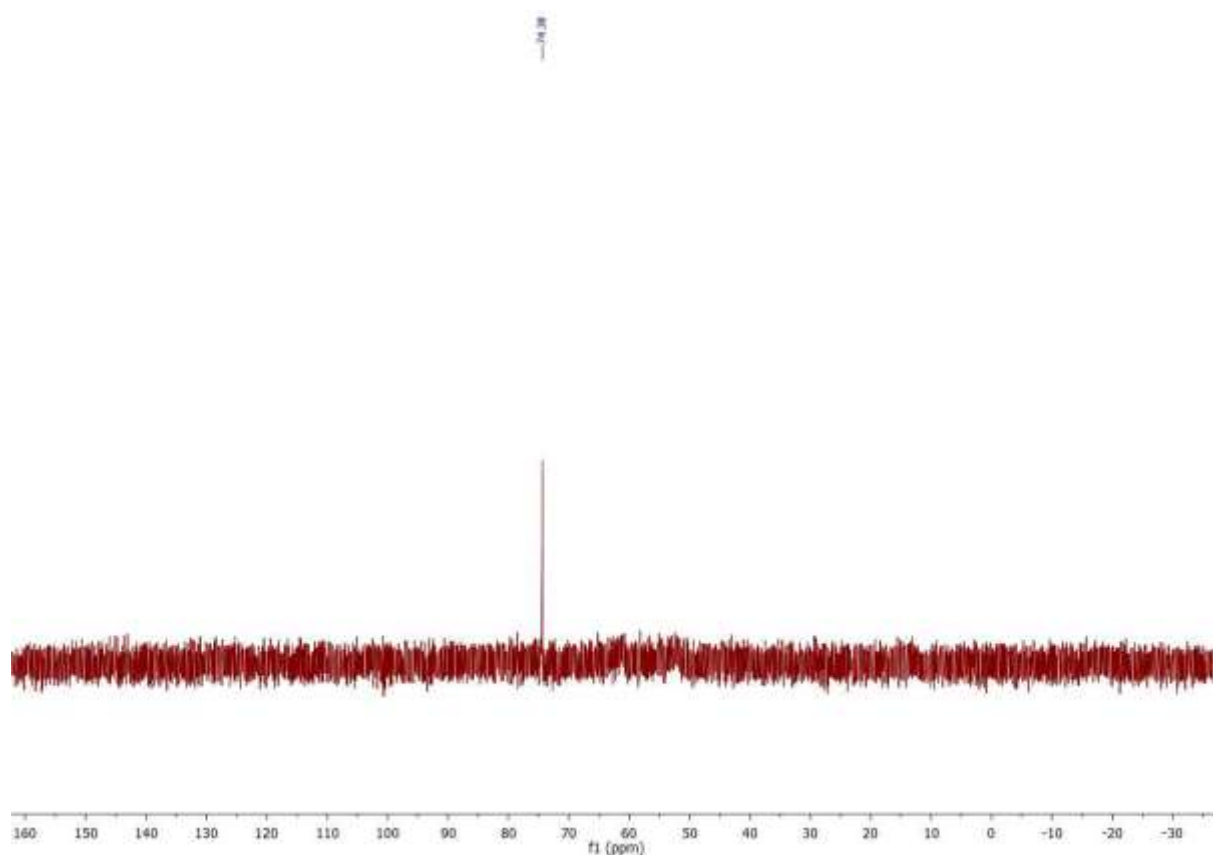

Figure S6:  $^{31}\text{P}$  NMR $\{^1\text{H}\}$  spectrum in  $\text{THF-d}_8$  of the crude mixture of the reduction of  $[\text{FeLBr}_2]$  by  $\text{KC}_8$  (2 equiv.)

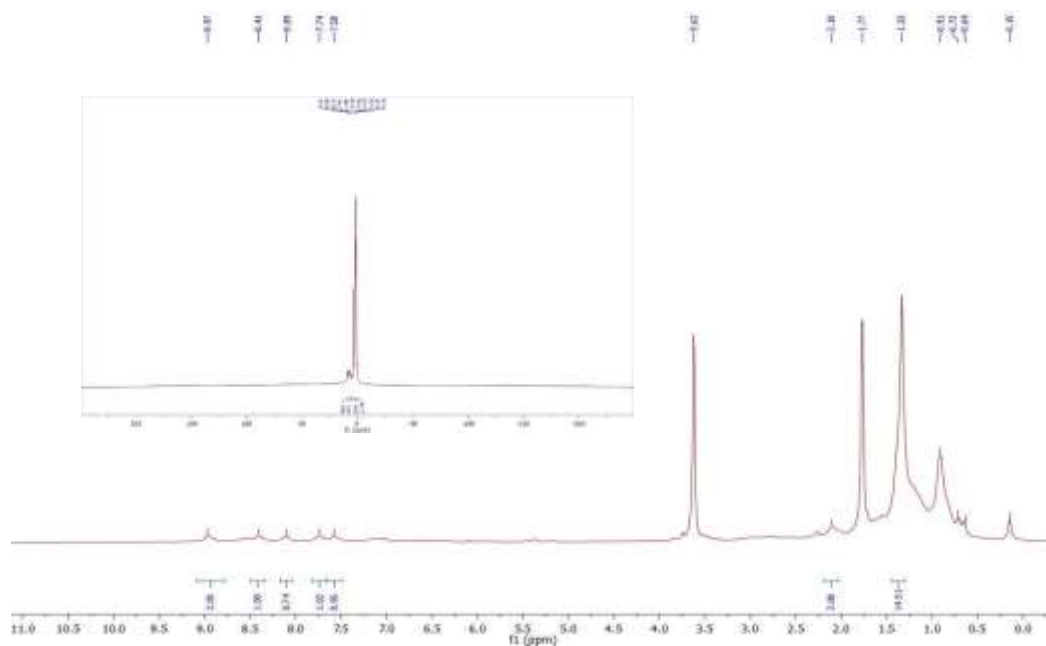

Figure S7:  $^1\text{H}$  NMR spectrum in  $\text{THF-d}_8$  spectrum of the crude mixture of the reduction of  $[\text{FeLBr}_2]$  by  $\text{KC}_8$  (2 equiv.).

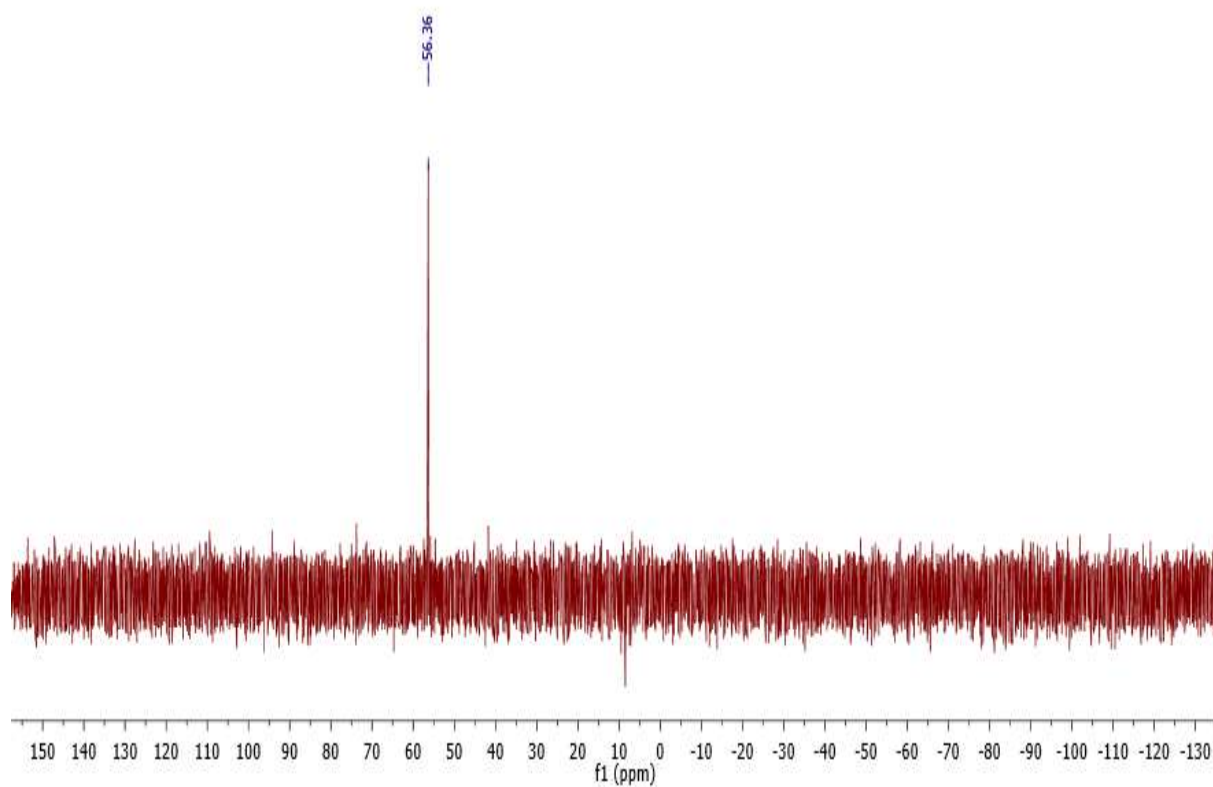

Figure S8:  $^{31}\text{P}$  NMR spectrum of  $[\text{NiL}_3]$  in  $\text{THF-d}_8$



## 2. X-Ray data

*Table S1: Crystallography data*

| <b>Compound</b>        | <b>[Co(L<sup>II</sup>)Br](CoBr<sub>3</sub>)</b>                                                               | <b>[Co L<sub>2</sub>Br]</b>                                            | <b>[NiLBr<sub>2</sub>]</b>                                                                    |
|------------------------|---------------------------------------------------------------------------------------------------------------|------------------------------------------------------------------------|-----------------------------------------------------------------------------------------------|
| Molecular formula      | C <sub>31</sub> H <sub>40</sub> Br <sub>4</sub> Cl <sub>2</sub> Co <sub>2</sub> N <sub>2</sub> P <sub>2</sub> | C <sub>15</sub> H <sub>20</sub> Br <sub>0.5</sub> Co <sub>0.5</sub> NP | C <sub>30</sub> H <sub>40</sub> Br <sub>4</sub> N <sub>2</sub> Ni <sub>2</sub> P <sub>2</sub> |
| Molecular weight       | 1010.99                                                                                                       | 314.71                                                                 | 927.64                                                                                        |
| Space group            | P-1                                                                                                           | Fddd                                                                   | P-1                                                                                           |
| T (K)                  | 150.0                                                                                                         | 150.0                                                                  | 150                                                                                           |
| V(Å <sup>3</sup> )     | 1888.6(5)                                                                                                     | 11910.1(17)                                                            | 1655.34(14)                                                                                   |
| a(Å)                   | 11.6902(18)                                                                                                   | 21.7708(17)                                                            | 10.6093(5)                                                                                    |
| b(Å)                   | 13.315(2)                                                                                                     | 22.4926(19)                                                            | 10.7482(5)                                                                                    |
| c(Å)                   | 14.484(2)                                                                                                     | 24.322(2)                                                              | 15.4756(8)                                                                                    |
| α(°)                   | 109.871(4)                                                                                                    | 90                                                                     | 108.104(3)                                                                                    |
| β(°)                   | 100.733(4)                                                                                                    | 90                                                                     | 98.410(3)                                                                                     |
| γ(°)                   | 109.062(4)                                                                                                    | 90                                                                     | 91.115(3)                                                                                     |
| Z                      | 2                                                                                                             | 32                                                                     | 2                                                                                             |
| d(g·cm <sup>-3</sup> ) | 1.778                                                                                                         | 1.404                                                                  | 1.861                                                                                         |
| F(000)                 | 996.0                                                                                                         | 5216.0                                                                 | 920.0                                                                                         |
| θ <sub>max</sub>       | 25.677                                                                                                        | 28.279                                                                 | 28.451                                                                                        |
| Rflns measd            | 33540                                                                                                         | 54844                                                                  | 87583                                                                                         |
| Unique data            | 7180                                                                                                          | 3697                                                                   | 8344                                                                                          |
| Rint                   | 0.0874                                                                                                        | 0.1139                                                                 | 0.0953                                                                                        |
| wR2                    | 0.1399                                                                                                        | 0.0643                                                                 | 0.0645                                                                                        |
| R1                     | 0.0580                                                                                                        | 0.0322                                                                 | 0.0341                                                                                        |
| GoF                    | 1.030                                                                                                         | 1.011                                                                  | 1.051                                                                                         |
| CCDC number            | 2284773                                                                                                       | 2284774                                                                | 2284775                                                                                       |

*Table S2: Crystallography data*

| <b>Compound</b>        | <b>[Ni L<sub>2</sub>Br](Br)</b>                                                                 | <b>[FeLBr<sub>2</sub>]</b>                           | <b>[NiL<sub>3</sub>]</b>                                                      |
|------------------------|-------------------------------------------------------------------------------------------------|------------------------------------------------------|-------------------------------------------------------------------------------|
| Molecular formula      | C <sub>31</sub> H <sub>42</sub> Br <sub>2</sub> Cl <sub>2</sub> N <sub>2</sub> NiP <sub>2</sub> | C <sub>15</sub> H <sub>20</sub> Br <sub>2</sub> FeNP | C <sub>45</sub> H <sub>60</sub> N <sub>3</sub> Ni <sub>3</sub> P <sub>3</sub> |
| Molecular weight       | 794.03                                                                                          | 460.96                                               | 912.00                                                                        |
| Space group            | P2 <sub>1</sub> /n                                                                              | P2 <sub>1</sub> /c                                   | P6 <sub>3</sub>                                                               |
| T (K)                  | 150                                                                                             | 150                                                  | 149.9                                                                         |
| V(Å <sup>3</sup> )     | 3442.2(13)                                                                                      | 1761.8(2)                                            | 2384.3(7)                                                                     |
| a(Å)                   | 11.482(2)                                                                                       | 10.4908(8)                                           | 15.101(2)                                                                     |
| b(Å)                   | 20.260(5)                                                                                       | 12.7615(9)                                           | 15.101(2)                                                                     |
| c(Å)                   | 15.511(3)                                                                                       | 13.1600(12)                                          | 12.0727(17)                                                                   |
| α(°)                   | 90                                                                                              | 90                                                   | 90                                                                            |
| β(°)                   | 107.439(5)                                                                                      | 90.251(5)                                            | 90                                                                            |
| γ(°)                   | 90                                                                                              | 90                                                   | 120                                                                           |
| Z                      | 4                                                                                               | 4                                                    | 2                                                                             |
| d(g·cm <sup>-3</sup> ) | 1.532                                                                                           | 1.738                                                | 1.270                                                                         |
| F(000)                 | 1616.0                                                                                          | 912.0                                                | 960.0                                                                         |
| θ <sub>max</sub>       | 25.681                                                                                          | 26.372                                               | 25.68                                                                         |
| Rflns measd            | 61917                                                                                           | 24863                                                | 24516                                                                         |
| Unique data            | 6529                                                                                            | 3598                                                 | 2997                                                                          |
| Rint                   | 0.1693                                                                                          | 0.0983                                               | 0.1513                                                                        |
| wR2                    | 0.0853                                                                                          | 0.0909                                               | 0.0995                                                                        |
| R1                     | 0.0473                                                                                          | 0.0443                                               | 0.0489                                                                        |
| GoF                    | 1.008                                                                                           | 1.016                                                | 0.901                                                                         |
| CCDC number            | 2284776                                                                                         | 2284777                                              | 2284778                                                                       |



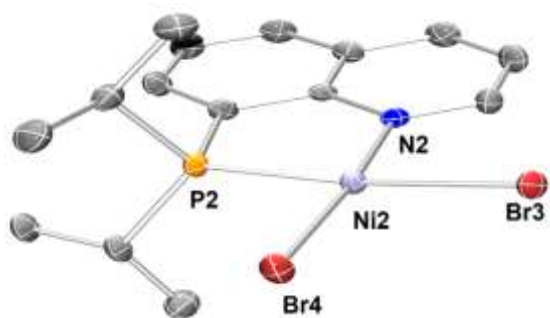

Figure S11: Ortep plot of the second molecule of **[NiLBr<sub>2</sub>]** with thermal ellipsoids (drawn at the 50% probability level). The cation, the H atoms and one CH<sub>2</sub>Cl<sub>2</sub> molecule were omitted for clarity. Selected bond lengths [Å] and angles [°]: Co1-N1 1.940(4); Co1-N2 1.933(7); Co1-P1 2.244(2); Co1-P2 2.270(2); Co1-Br1 2.532(2); C1-C10 1.479(9); P1-Co1-N1 83.4(2); P1-Co1-N2 85.0(2); P1-Co1-P2 108.49(9); N1-Co1-N2 80.8(3); N1-Co1-Br1 88.2(2); P1-Co1-Br1 98.21(7); N2-Co1-Br1 97.2(2); P2-Co1-Br1 98.95(7).
